# Supplementary material for: Evaluating a community-based exercise intervention with adults living with HIV: protocol for an interrupted time series study
Source: PubMed Central journal article supplement — BMJ Open. 2016 Oct 20;6(10):e013618. doi: 10.1136/bmjopen-2016-013618 (PMC5073553; doi:10.1136/bmjopen-2016-013618), 2016-10-20
Supplement: Supplemental-File_1.pdf [file Supplemental-File_1.pdf]

## Supplemental File 1 – World Health Organization Trial Registration Data Set

Evaluating a Community-Based Exercise Intervention with Adults Living with HIV: Protocol for an Interrupted Time Series Study

### Protocol Version

**Date:** June 1, 2016; **Version Identifier:** Version 1

| Data Category                                 | Information                                                                                                                                                                                                                                                     |
|-----------------------------------------------|-----------------------------------------------------------------------------------------------------------------------------------------------------------------------------------------------------------------------------------------------------------------|
| Primary registry and trial identifying number | Clinical Trials.gov Identifier: NCT02794415                                                                                                                                                                                                                     |
| Data of registration in primary registry      | June 1, 2016                                                                                                                                                                                                                                                    |
| Secondary identifying numbers                 | University of Toronto Research Ethics Board Protocol #32910                                                                                                                                                                                                     |
| Source(s) of monetary or material support     | Canadian Institutes of Health Research (CIHR)                                                                                                                                                                                                                   |
| Primary sponsor                               | Canadian Institutes of Health Research (CIHR)                                                                                                                                                                                                                   |
| Collaborators                                 | YMCA                                                                                                                                                                                                                                                            |
| Contact for public queries                    | Kelly K. O'Brien (KKO), PhD, BScPT<br>University of Toronto<br>Department of Physical Therapy<br>500 University Avenue, Room 160<br>Toronto, ON M5G 1V7<br>Phone: 416-978-0565<br>Email: <a href="mailto:kelly.obrien@utoronto.ca">kelly.obrien@utoronto.ca</a> |
| Contact for scientific queries                | Canadian Institutes of Health Research (CIHR)<br>160 Elgin Street, 9 <sup>th</sup> Floor<br>Ottawa, Ontario K1A 0W9<br>Phone: 613-941-2642<br>Email: <a href="mailto:support@cihr-irsc.gc.ca">support@cihr-irsc.gc.ca</a>                                       |
| Public Title                                  | YMCA Community-Based Exercise Study                                                                                                                                                                                                                             |
| Scientific Title                              | Translating Exercise Into the HIV Community: Evaluating a Community-based Exercise Intervention to Improve the Health of Adults Living With HIV                                                                                                                 |
| Countries of recruitment                      | Canada                                                                                                                                                                                                                                                          |
| Health condition(s) or problem(s) studied     | HIV                                                                                                                                                                                                                                                             |

## Supplemental File 1 – World Health Organization Trial Registration Data Set

Evaluating a Community-Based Exercise Intervention with Adults Living with HIV: Protocol for an Interrupted Time Series Study

| Data Category                        | Information                                                                                                                                                                                                                                                                                                                                                                                                                                                                                                                                                                                                                                                                                                                                                                                                                                      |
|--------------------------------------|--------------------------------------------------------------------------------------------------------------------------------------------------------------------------------------------------------------------------------------------------------------------------------------------------------------------------------------------------------------------------------------------------------------------------------------------------------------------------------------------------------------------------------------------------------------------------------------------------------------------------------------------------------------------------------------------------------------------------------------------------------------------------------------------------------------------------------------------------|
| Intervention(s) Active comparator    | <p>Intervention: Community-Based Exercise</p> <p>Intervention Phase (6 months): The HIV Community-Based Exercise (CBE) intervention is a 6-month exercise program at the Central Toronto YMCA. Participants will meet the fitness instructor to establish an individualized exercise program that will include a combination of aerobic, resistive, neuromotor and flexibility training. Participants will attend exercise sessions for ~1.5 hour, 3 times per week for 24 weeks. Sessions will be supervised weekly by a fitness instructor.</p> <p>Post-Intervention Phase (8 months): At the end of the 24 week intervention, participants will be encouraged to continue to engage in unsupervised exercise 3 times per week. As per usual practice at the YMCA, a fitness instructor will be available to monitor participants monthly.</p> |
| Placebo comparator                   | Not applicable                                                                                                                                                                                                                                                                                                                                                                                                                                                                                                                                                                                                                                                                                                                                                                                                                                   |
| Key inclusion and exclusion criteria | ≥18 years                                                                                                                                                                                                                                                                                                                                                                                                                                                                                                                                                                                                                                                                                                                                                                                                                                        |
| Sexes eligible for study             | Both                                                                                                                                                                                                                                                                                                                                                                                                                                                                                                                                                                                                                                                                                                                                                                                                                                             |
| Accepts healthy volunteers           | No                                                                                                                                                                                                                                                                                                                                                                                                                                                                                                                                                                                                                                                                                                                                                                                                                                               |
| Inclusion criteria                   | Adults (18 years and older) living with HIV in Toronto who consider themselves medically stable and safe to engage in exercise and who are willing to participate in a 22 month study involving a 14 month CBE intervention at the YMCA.                                                                                                                                                                                                                                                                                                                                                                                                                                                                                                                                                                                                         |
| Exclusion criteria                   | Anyone not meeting above inclusion criteria                                                                                                                                                                                                                                                                                                                                                                                                                                                                                                                                                                                                                                                                                                                                                                                                      |
| Study type                           | Interventional; single group assignment; open label; interrupted time series analysis;                                                                                                                                                                                                                                                                                                                                                                                                                                                                                                                                                                                                                                                                                                                                                           |
| Date of first enrolment              | June 2016                                                                                                                                                                                                                                                                                                                                                                                                                                                                                                                                                                                                                                                                                                                                                                                                                                        |
| Target sample size                   | 120                                                                                                                                                                                                                                                                                                                                                                                                                                                                                                                                                                                                                                                                                                                                                                                                                                              |
| Recruitment status                   | Recruiting                                                                                                                                                                                                                                                                                                                                                                                                                                                                                                                                                                                                                                                                                                                                                                                                                                       |
| Primary outcome(s)                   | Maximum oxygen consumption (VO <sub>2</sub> max)                                                                                                                                                                                                                                                                                                                                                                                                                                                                                                                                                                                                                                                                                                                                                                                                 |
| Key secondary outcomes               | <p>Physical health (cardiopulmonary fitness; strength; weight, body composition, anthropometrics; flexibility)</p> <p>Disability</p> <p>Quality of Life</p> <p>Mental health</p> <p>Cognitive health</p> <p>Coping</p> <p>Mastery</p> <p>Stigma</p> <p>Social support</p>                                                                                                                                                                                                                                                                                                                                                                                                                                                                                                                                                                        |
